# Supplementary material for: The Bamboo Rhizome Evolution in China Is Driven by Geographical Isolation and Trait Differentiation
Source: MDPI journal article supplement (doi:10.3390/f12091280), 2021-09-18
Supplement: s1 [file s1]

## Supplementary Material

**Table S1.** The list of bamboo species in China.

| scientific name          | genus   | Evolution | Endemism        | Height<br>(m) | leaf<br>length<br>(cm) |
|--------------------------|---------|-----------|-----------------|---------------|------------------------|
| Bambusa blumeana         | Bambusa | Sympodial | non-<br>endemic | 19.5          | 15                     |
| Bambusa flexuosa         | Bambusa | Sympodial | endemic         | 6.5           | 9                      |
| Bambusa sinospinosa      | Bambusa | Sympodial | non-<br>endemic | 19.5          | 12                     |
| Bambusa funghomii        | Bambusa | Sympodial | endemic         | 14            | 10.5                   |
| Bambusa chunii           | Bambusa | Sympodial | non-<br>endemic | 11            | 14.25                  |
| Bambusa angustissima     | Bambusa | Sympodial | endemic         | 9             | 7.5                    |
| Bambusa glabrovagina     | Bambusa | Sympodial | non-<br>endemic | 5             | 1.75                   |
| Bambusa dissimulator     | Bambusa | Sympodial | endemic         | 14            | 12.5                   |
| Bambusa aurinuda         | Bambusa | Sympodial | non-<br>endemic | 7.5           | 11.25                  |
| Bambusa macrotis         | Bambusa | Sympodial | endemic         | 6.5           | 7.5                    |
| Bambusa rutila           | Bambusa | Sympodial | non-<br>endemic | 10            | 14                     |
| Bambusa lapidea          | Bambusa | Sympodial | endemic         | 12            | 15.5                   |
| Bambusa latideltata      | Bambusa | Sympodial | endemic         | 6             | 11                     |
| Bambusa indigena         | Bambusa | Sympodial | endemic         | 12            | 9.25                   |
| Bambusa longipalea       | Bambusa | Sympodial | endemic         | 8             | 13.25                  |
| Bambusa cornigera        | Bambusa | Sympodial | endemic         | 10.5          | 16                     |
| Bambusa subaequalis      | Bambusa | Sympodial | endemic         | 10            | 12.5                   |
| Bambusa gibba            | Bambusa | Sympodial | non-<br>endemic | 8.5           | 11.5                   |
| Bambusa malingensis      | Bambusa | Sympodial | non-<br>endemic | 9             | 11.5                   |
| Bambusa angustiaurita    | Bambusa | Sympodial | endemic         | 9             | 12                     |
| Bambusa ventricosa       | Bambusa | Sympodial | non-<br>endemic | 9             | 13.5                   |
| Bambusa corniculata      | Bambusa | Sympodial | endemic         | 8             | 16.5                   |
| Bambusa diaoluoshanensis | Bambusa | Sympodial | endemic         | 10            | 11.75                  |
| Bambusa insularis        | Bambusa | Sympodial | endemic         | 9             | 11                     |
| Bambusa xiashanensis     | Bambusa | Sympodial | endemic         | 12.5          | 15                     |
| Bambusa prominens        | Bambusa | Sympodial | endemic         | 12.5          | 20                     |
| Bambusa ramispinosa      | Bambusa | Sympodial | endemic         | 8             | 11.25                  |
| Bambusa polymorpha       | Bambusa | Sympodial | non-<br>endemic | 17.5          | 17.5                   |
| Bambusa tulda            | Bambusa | Sympodial | non-            | 14            | 17                     |

|                        |         |           |         |      |       |
|------------------------|---------|-----------|---------|------|-------|
|                        |         |           | endemic |      |       |
| Bambusa teres          | Bambusa | Sympodial | non-    | 9    | 17.5  |
|                        |         |           | endemic |      |       |
| Bambusa burmanica      | Bambusa | Sympodial | non-    | 7.5  | 20.5  |
|                        |         |           | endemic |      |       |
| Bambusa eutuldoides    | Bambusa | Sympodial | non-    | 9    | 18.5  |
|                        |         |           | endemic |      |       |
| Bambusa pervariabilis  | Bambusa | Sympodial | endemic | 8.5  | 12.5  |
| Bambusa longispiculata | Bambusa | Sympodial | non-    | 10   | 12    |
|                        |         |           | endemic |      |       |
| Bambusa tuldooides     | Bambusa | Sympodial | non-    | 8    | 14    |
|                        |         |           | endemic |      |       |
| Bambusa subtruncata    | Bambusa | Sympodial | endemic | 4.5  | 11.5  |
| Bambusa crispiaurita   | Bambusa | Sympodial | endemic | 8    | 12.5  |
| Bambusa rigida         | Bambusa | Sympodial | non-    | 8.5  | 12.75 |
|                        |         |           | endemic |      |       |
| Bambusa boniopsis      | Bambusa | Sympodial | non-    | 4.5  | 13    |
|                        |         |           | endemic |      |       |
| Bambusa dolichoclada   | Bambusa | Sympodial | non-    | 12.5 | 18    |
|                        |         |           | endemic |      |       |
| Bambusa vulgaris       | Bambusa | Sympodial | non-    | 11.5 | 20    |
|                        |         |           | endemic |      |       |
| Bambusa utilis         | Bambusa | Sympodial | endemic | 8.5  | 17.5  |
| Bambusa gibboides      | Bambusa | Sympodial | endemic | 11   | 15    |
| Bambusa piscatorum     | Bambusa | Sympodial | endemic | 8    | 14    |
| Bambusa albolineata    | Bambusa | Sympodial | endemic | 7    | 15.5  |
| Bambusa pallida        | Bambusa | Sympodial | non-    | 15   | 15    |
|                        |         |           | endemic |      |       |
| Bambusa duriuscula     | Bambusa | Sympodial | endemic | 6.5  | 11.5  |
| Bambusa pachinensis    | Bambusa | Sympodial | non-    | 5.5  | 13    |
|                        |         |           | endemic |      |       |
| Bambusa amplexicaulis  | Bambusa | Sympodial | endemic | 3    | 7     |
| Bambusa semitecta      | Bambusa | Sympodial | endemic | 2.5  | 13.25 |
| Bambusa lenta          | Bambusa | Sympodial | non-    | 7.5  | 13    |
|                        |         |           | endemic |      |       |
| Bambusa mutabilis      | Bambusa | Sympodial | endemic | 6    | 14.25 |
| Bambusa mollis         | Bambusa | Sympodial | endemic | 6.5  | 13.5  |
| Bambusa contracta      | Bambusa | Sympodial | endemic | 5.5  | 12.5  |
| Bambusa textilis       | Bambusa | Sympodial | non-    | 9    | 13    |
|                        |         |           | endemic |      |       |
| Bambusa truncata       | Bambusa | Sympodial | non-    | 7    | 11    |
|                        |         |           | endemic |      |       |
| Bambusa multiplex      | Bambusa | Sympodial | non-    | 5.5  | 10.5  |
|                        |         |           | endemic |      |       |

|                                   |                      |           |             |      |       |
|-----------------------------------|----------------------|-----------|-------------|------|-------|
| <i>Bambusa intermedia</i>         | <i>Bambusa</i>       | Sympodial | non-endemic | 11   | 12.5  |
| <i>Bambusa wenchouensis</i>       | <i>Bambusa</i>       | Sympodial | endemic     | 14   | 12.5  |
| <i>Bambusa remotiflora</i>        | <i>Bambusa</i>       | Sympodial | non-endemic | 10   | 14.5  |
| <i>Bambusa surrecta</i>           | <i>Bambusa</i>       | Sympodial | endemic     | 8    | 15    |
| <i>Bambusa cerosissima</i>        | <i>Bambusa</i>       | Sympodial | non-endemic | 9    | 18    |
| <i>Bambusa chungii</i>            | <i>Bambusa</i>       | Sympodial | endemic     | 10.5 | 15    |
| <i>Bambusa distegia</i>           | <i>Bambusa</i>       | Sympodial | endemic     | 10   | 10.5  |
| <i>Bambusa guangxiensis</i>       | <i>Bambusa</i>       | Sympodial | endemic     | 3.5  | 12    |
| <i>Bambusa papillata</i>          | <i>Bambusa</i>       | Sympodial | endemic     | 4.5  | 13.5  |
| <i>Bambusa emeiensis</i>          | <i>Bambusa</i>       | Sympodial | non-endemic | 7.5  | 20    |
| <i>Bambusa hainanensis</i>        | <i>Bambusa</i>       | Sympodial | endemic     | 0.25 | 20.5  |
| <i>Bambusa fimbriiligulata</i>    | <i>Bambusa</i>       | Sympodial | endemic     | 6    | 15.5  |
| <i>Bambusa papillatoides</i>      | <i>Bambusa</i>       | Sympodial | endemic     | 4.5  | 12.5  |
| <i>Bambusa rugata</i>             | <i>Bambusa</i>       | Sympodial | non-endemic | 3.5  | 9.25  |
| <i>Bambusa variostrata</i>        | <i>Bambusa</i>       | Sympodial | endemic     | 8.5  | 19.5  |
| <i>Bambusa odashimae</i>          | <i>Bambusa</i>       | Sympodial | endemic     | 20   | 27    |
| <i>Bambusa oldhamii</i>           | <i>Bambusa</i>       | Sympodial | non-endemic | 9    | 22.5  |
| <i>Bambusa basihirsuta</i>        | <i>Bambusa</i>       | Sympodial | non-endemic | 9.5  | 19    |
| <i>Bambusa beecheyana</i>         | <i>Bambusa</i>       | Sympodial | endemic     | 16   | 19.5  |
| <i>Bambusa stenoaurita</i>        | <i>Bambusa</i>       | Sympodial | endemic     | 10   | 19    |
| <i>Bambusa grandis</i>            | <i>Bambusa</i>       | Sympodial | endemic     | 12.5 | 17.5  |
| <i>Bambusa bicicatricata</i>      | <i>Bambusa</i>       | Sympodial | non-endemic | 10   | 15.5  |
| <i>Bambusa xueana</i>             | <i>Bambusa</i>       | Sympodial | endemic     | 10   | 18.5  |
| <i>Thyrsostachys oliveri</i>      | <i>Thyrsostachys</i> | Sympodial | non-endemic | 17.5 | 15    |
| <i>Thyrsostachys siamensis</i>    | <i>Thyrsostachys</i> | Sympodial | non-endemic | 10.5 | 13.5  |
| <i>Dendrocalamus strictus</i>     | <i>Dendrocalamus</i> | Sympodial | non-endemic | 12   | 21    |
| <i>Dendrocalamus membranaceus</i> | <i>Dendrocalamus</i> | Sympodial | non-endemic | 15.5 | 18.75 |
| <i>Dendrocalamus barbatus</i>     | <i>Dendrocalamus</i> | Sympodial | endemic     | 16.5 | 12.5  |
| <i>Dendrocalamus birmanicus</i>   | <i>Dendrocalamus</i> | Sympodial | non-endemic | 8.5  | 18    |
| <i>Dendrocalamus bambusoides</i>  | <i>Dendrocalamus</i> | Sympodial | endemic     | 11   | 11    |
| <i>Dendrocalamus tibeticus</i>    | <i>Dendrocalamus</i> | Sympodial | endemic     | 18.5 | 21    |

|                                    |                      |           |             |          |       |
|------------------------------------|----------------------|-----------|-------------|----------|-------|
| <i>Dendrocalamus farinosus</i>     | <i>Dendrocalamus</i> | Sympodial | endemic     | 9.5      | 21    |
| <i>Dendrocalamus tsiangii</i>      | <i>Dendrocalamus</i> | Sympodial | endemic     | 7        | 11    |
| <i>Dendrocalamus pulverulentus</i> | <i>Dendrocalamus</i> | Sympodial | non-endemic | 8        | 16.5  |
| <i>Dendrocalamus liboensis</i>     | <i>Dendrocalamus</i> | Sympodial | endemic     | 13.5     | 24    |
| <i>Dendrocalamus hamiltonii</i>    | <i>Dendrocalamus</i> | Sympodial | non-endemic | 15       | 38    |
| <i>Dendrocalamus semiscandens</i>  | <i>Dendrocalamus</i> | Sympodial | non-endemic | 12.5     | 30    |
| <i>Dendrocalamus brandisii</i>     | <i>Dendrocalamus</i> | Sympodial | non-endemic | 12.5     | 26.5  |
| <i>Dendrocalamus sikkimensis</i>   | <i>Dendrocalamus</i> | Sympodial | non-endemic | 14       | 22.5  |
| <i>Dendrocalamus asper</i>         | <i>Dendrocalamus</i> | Sympodial | non-endemic | 17.5     | 22.5  |
| <i>Dendrocalamus parishii</i>      | <i>Dendrocalamus</i> | Sympodial | non-endemic | 10       | 17    |
| <i>Dendrocalamus giganteus</i>     | <i>Dendrocalamus</i> | Sympodial | non-endemic | 25       | 45    |
| <i>Dendrocalamus sinicus</i>       | <i>Dendrocalamus</i> | Sympodial | endemic     | 25       | 30    |
| <i>Dendrocalamus calostachyus</i>  | <i>Dendrocalamus</i> | Sympodial | non-endemic | 11.32143 | 26.5  |
| <i>Dendrocalamus fugongensis</i>   | <i>Dendrocalamus</i> | Sympodial | endemic     | 20       | 21.5  |
| <i>Dendrocalamus pachystachys</i>  | <i>Dendrocalamus</i> | Sympodial | endemic     | 11       | 40    |
| <i>Dendrocalamus latiflorus</i>    | <i>Dendrocalamus</i> | Sympodial | non-endemic | 22.5     | 32.5  |
| <i>Dendrocalamus jianshuiensis</i> | <i>Dendrocalamus</i> | Sympodial | non-endemic | 17.5     | 29    |
| <i>Dendrocalamus yunnanicus</i>    | <i>Dendrocalamus</i> | Sympodial | non-endemic | 21.5     | 30    |
| <i>Dendrocalamus minor</i>         | <i>Dendrocalamus</i> | Sympodial | endemic     | 9        | 22.5  |
| <i>Dendrocalamus peculiaris</i>    | <i>Dendrocalamus</i> | Sympodial | endemic     | 15.5     | 32.5  |
| <i>Dendrocalamus tomentosus</i>    | <i>Dendrocalamus</i> | Sympodial | endemic     | 20       | 29.5  |
| <i>Gigantochloa levis</i>          | <i>Gigantochloa</i>  | Sympodial | non-endemic | 11.5     | 20    |
| <i>Gigantochloa nigrociliata</i>   | <i>Gigantochloa</i>  | Sympodial | non-endemic | 11.5     | 27.5  |
| <i>Gigantochloa albociliata</i>    | <i>Gigantochloa</i>  | Sympodial | non-endemic | 8        | 17.5  |
| <i>Gigantochloa verticillata</i>   | <i>Gigantochloa</i>  | Sympodial | non-endemic | 11.5     | 35.5  |
| <i>Gigantochloa felix</i>          | <i>Gigantochloa</i>  | Sympodial | endemic     | 9        | 37.5  |
| <i>Gigantochloa parviflora</i>     | <i>Gigantochloa</i>  | Sympodial | endemic     | 8.918707 | 22    |
| <i>Melocalamus compactiflorus</i>  | <i>Melocalamus</i>   | Sympodial | non-        | 40       | 11.25 |

|                            |                 |            |             |      |       |
|----------------------------|-----------------|------------|-------------|------|-------|
|                            |                 |            | endemic     |      |       |
| Melocalamus scandens       | Melocalamus     | Sympodial  | endemic     | 20   | 20    |
| Melocalamus elevatissimus  | Melocalamus     | Sympodial  | endemic     | 20   | 30    |
| Melocalamus arrectus       | Melocalamus     | Sympodial  | endemic     | 12.5 | 16.75 |
| Bonia saxatilis            | Bonia           | Sympodial  | non-endemic | 2.5  | 27.5  |
| Bonia levigata             | Bonia           | Sympodial  | non-endemic | 3    | 27.5  |
| Bonia amplexicaulis        | Bonia           | Sympodial  | endemic     | 3.5  | 32.5  |
| Bonia parvifloscula        | Bonia           | Sympodial  | endemic     | 1.1  | 16.5  |
| Schizostachyum chinense    | Schizostachyum  | Sympodial  | non-endemic | 6.5  | 20.5  |
| Schizostachyum jaculans    | Schizostachyum  | Sympodial  | non-endemic | 15   | 10.25 |
| Schizostachyum diffusum    | Schizostachyum  | Sympodial  | non-endemic | 40   | 17.5  |
| Schizostachyum hainanense  | Schizostachyum  | Sympodial  | non-endemic | 19   | 16.5  |
| Schizostachyum dumetorum   | Schizostachyum  | Sympodial  | endemic     | 6.5  | 11.5  |
| Schizostachyum pseudolima  | Schizostachyum  | Sympodial  | non-endemic | 10   | 24    |
| Schizostachyum auriculatum | Schizostachyum  | Sympodial  | endemic     | 12   | 16    |
| Schizostachyum funghomii   | Schizostachyum  | Sympodial  | endemic     | 12   | 25    |
| Schizostachyum sanguineum  | Schizostachyum  | Sympodial  | non-endemic | 6    | 19    |
| Cephalostachyum mannii     | Cephalostachyum | Sympodial  | non-endemic | 16   | 13.5  |
| Cephalostachyum scandens   | Cephalostachyum | Sympodial  | non-endemic | 35   | 21    |
| Cephalostachyum pergracile | Cephalostachyum | Sympodial  | non-endemic | 10.5 | 25    |
| Cephalostachyum latifolium | Cephalostachyum | Sympodial  | non-endemic | 18   | 27.5  |
| Cephalostachyum pallidum   | Cephalostachyum | Sympodial  | non-endemic | 9    | 20    |
| Cephalostachyum virgatum   | Cephalostachyum | Sympodial  | non-endemic | 13.5 | 22.5  |
| Pseudostachyum polymorphum | Pseudostachyum  | Monopodial | non-endemic | 7.5  | 23.75 |
| Melocanna humilis          | Melocanna       | Sympodial  | non-endemic | 14   | 25    |

|                             |                 |                |             |      |       |
|-----------------------------|-----------------|----------------|-------------|------|-------|
| Neomicrocalamus prainii     | Neomicrocalamus | Sympodial      | non-endemic | 20   | 8.25  |
| Neomicrocalamus yunnanensis | Neomicrocalamus | Sympodial      | endemic     | 10.5 | 5.5   |
| Yushania vigens             | Yushania        | Monopodia<br>1 | endemic     | 4.75 | 13.75 |
| Yushania brevipaniculata    | Yushania        | Monopodia<br>1 | endemic     | 2.25 | 9.5   |
| Yushania glauca             | Yushania        | Monopodia<br>1 | endemic     | 5    | 13.5  |
| Yushania lineolata          | Yushania        | Monopodia<br>1 | endemic     | 3.5  | 9.5   |
| Yushania hirticaulis        | Yushania        | Monopodia<br>1 | endemic     | 1.85 | 12    |
| Yushania falcataaurita      | Yushania        | Monopodia<br>1 | endemic     | 2.75 | 5.25  |
| Yushania canoviridis        | Yushania        | Monopodia<br>1 | endemic     | 1.6  | 7.25  |
| Yushania weixiensis         | Yushania        | Monopodia<br>1 | endemic     | 1.5  | 5.2   |
| Yushania qiaojiaensis       | Yushania        | Monopodia<br>1 | endemic     | 0.55 | 3     |
| Yushania cava               | Yushania        | Monopodia<br>1 | endemic     | 4.75 | 4.15  |
| Yushania yadongensis        | Yushania        | Monopodia<br>1 | non-endemic | 4    | 4.75  |
| Yushania violascens         | Yushania        | Monopodia<br>1 | endemic     | 1.75 | 6.5   |
| Yushania crassicollis       | Yushania        | Monopodia<br>1 | endemic     | 4    | 7     |
| Yushania bojiciana          | Yushania        | Monopodia<br>1 | endemic     | 4    | 4.3   |
| Yushania complanata         | Yushania        | Monopodia<br>1 | endemic     | 3.75 | 10.5  |
| Yushania longissima         | Yushania        | Monopodia<br>1 | endemic     | 1.5  | 6.5   |
| Yushania flexa              | Yushania        | Monopodia<br>1 | endemic     | 4    | 11.5  |
| Yushania exilis             | Yushania        | Monopodia<br>1 | endemic     | 2    | 5.9   |
| Yushania varians            | Yushania        | Monopodia<br>1 | endemic     | 1.5  | 8.75  |
| Yushania maculata           | Yushania        | Monopodia<br>1 | endemic     | 2.75 | 12    |

|                          |          |                |         |       |       |
|--------------------------|----------|----------------|---------|-------|-------|
| Yushania longiuscula     | Yushania | Monopodia<br>1 | endemic | 4.5   | 13.1  |
| Yushania crispata        | Yushania | Monopodia<br>1 | endemic | 4.5   | 10.5  |
| Yushania lacera          | Yushania | Monopodia<br>1 | endemic | 2     | 13    |
| Yushania elevata         | Yushania | Monopodia<br>1 | endemic | 5.5   | 7     |
| Yushania baishanzuensis  | Yushania | Monopodia<br>1 | endemic | 1.75  | 10    |
| Yushania farcticaulis    | Yushania | Monopodia<br>1 | endemic | 5.5   | 10    |
| Yushania levigata        | Yushania | Monopodia<br>1 | endemic | 4     | 7.75  |
| Yushania ailuropodina    | Yushania | Monopodia<br>1 | endemic | 4     | 5.75  |
| Yushania mitis           | Yushania | Monopodia<br>1 | endemic | 3.75  | 5.85  |
| Yushania xizangensis     | Yushania | Monopodia<br>1 | endemic | 4.5   | 7     |
| Yushania brevis          | Yushania | Monopodia<br>1 | endemic | 1.75  | 9.25  |
| Yushania menghaiensis    | Yushania | Monopodia<br>1 | endemic | 2.75  | 13.5  |
| Yushania collina         | Yushania | Monopodia<br>1 | endemic | 3     | 14.75 |
| Yushania farinosa        | Yushania | Monopodia<br>1 | endemic | 2.5   | 10.5  |
| Yushania laetevirens     | Yushania | Monopodia<br>1 | endemic | 3     | 13    |
| Yushania multiramea      | Yushania | Monopodia<br>1 | endemic | 3.5   | 8.75  |
| Yushania mabianensis     | Yushania | Monopodia<br>1 | endemic | 1.5   | 13.5  |
| Yushania andropogonoides | Yushania | Monopodia<br>1 | endemic | 0.725 | 11    |
| Yushania grammata        | Yushania | Monopodia<br>1 | endemic | 2.25  | 20.5  |
| Yushania polytricha      | Yushania | Monopodia<br>1 | endemic | 1.5   | 15    |
| Yushania basihirsuta     | Yushania | Monopodia<br>1 | endemic | 2.25  | 11    |
| Yushania longiaurita     | Yushania | Monopodia<br>1 | endemic | 1.5   | 8     |

|                            |               |                |                 |          |       |
|----------------------------|---------------|----------------|-----------------|----------|-------|
| Yushania chingii           | Yushania      | Monopodia<br>1 | endemic         | 1.75     | 19.5  |
| Yushania auctiaurita       | Yushania      | Monopodia<br>1 | endemic         | 1.75     | 9     |
| Yushania dafengdingensis   | Yushania      | Monopodia<br>1 | endemic         | 3        | 11.25 |
| Yushania straminea         | Yushania      | Monopodia<br>1 | endemic         | 3        | 12.25 |
| Yushania oblonga           | Yushania      | Monopodia<br>1 | endemic         | 3.75     | 15.5  |
| Yushania cartilaginea      | Yushania      | Monopodia<br>1 | endemic         | 1.35     | 10.5  |
| Yushania wuyishanensis     | Yushania      | Monopodia<br>1 | endemic         | 4        | 8.5   |
| Yushania glandulosa        | Yushania      | Monopodia<br>1 | endemic         | 2.5      | 15.25 |
| Yushania rugosa            | Yushania      | Monopodia<br>1 | endemic         | 1.5      | 14.5  |
| Yushania uniramosa         | Yushania      | Monopodia<br>1 | endemic         | 1.1      | 16.5  |
| Yushania confusa           | Yushania      | Monopodia<br>1 | endemic         | 1.5      | 12.25 |
| Yushania pauciramificans   | Yushania      | Monopodia<br>1 | endemic         | 2.75     | 10.6  |
| Yushania punctulata        | Yushania      | Monopodia<br>1 | endemic         | 1.4      | 18    |
| Yushania pachyclada        | Yushania      | Monopodia<br>1 | endemic         | 1.5      | 10    |
| Yushania niitakayamensis   | Yushania      | Monopodia<br>1 | non-<br>endemic | 2.3      | 10    |
| Yushania suijiangensis     | Yushania      | Monopodia<br>1 | endemic         | 1.5      | 10.5  |
| Thamnocalamus spathiflorus | Thamnocalamus | Sympodial      | non-<br>endemic | 4.25     | 6.75  |
| Fargesia canaliculata      | Fargesia      | Sympodial      | endemic         | 4        | 5.25  |
| Fargesia stenoclada        | Fargesia      | Sympodial      | endemic         | 4        | 5.7   |
| Fargesia brevissima        | Fargesia      | Sympodial      | endemic         | 4        | 8     |
| Fargesia zayuensis         | Fargesia      | Sympodial      | endemic         | 6        | 6.75  |
| Fargesia orbiculata        | Fargesia      | Sympodial      | endemic         | 5        | 6.5   |
| Fargesia murielae          | Fargesia      | Sympodial      | endemic         | 3        | 8     |
| Fargesia denudata          | Fargesia      | Sympodial      | endemic         | 4        | 7     |
| Fargesia similaris         | Fargesia      | Sympodial      | non-<br>endemic | 4.510904 | 3.9   |
| Fargesia utilis            | Fargesia      | Sympodial      | endemic         | 4        | 7     |



|                                |                 |                 |                 |          |       |
|--------------------------------|-----------------|-----------------|-----------------|----------|-------|
| <i>Fargesia extensa</i>        | <i>Fargesia</i> | Amphipodi<br>al | non-<br>endemic | 5.25     | 11    |
| <i>Fargesia obliqua</i>        | <i>Fargesia</i> | Sympodial       | endemic         | 3        | 8     |
| <i>Fargesia frigidis</i>       | <i>Fargesia</i> | Sympodial       | non-<br>endemic | 2.75     | 3.75  |
| <i>Fargesia melanostachys</i>  | <i>Fargesia</i> | Sympodial       | endemic         | 5        | 5.5   |
| <i>Fargesia scabrida</i>       | <i>Fargesia</i> | Sympodial       | endemic         | 3.9      | 11    |
| <i>Fargesia rufa</i>           | <i>Fargesia</i> | Sympodial       | endemic         | 3        | 8     |
| <i>Fargesia dura</i>           | <i>Fargesia</i> | Sympodial       | endemic         | 3.5      | 8.25  |
| <i>Fargesia macclureana</i>    | <i>Fargesia</i> | Sympodial       | endemic         | 4        | 10.5  |
| <i>Fargesia sylvestris</i>     | <i>Fargesia</i> | Sympodial       | endemic         | 3.5      | 7.1   |
| <i>Fargesia subflexuosa</i>    | <i>Fargesia</i> | Sympodial       | endemic         | 4.5      | 14    |
| <i>Fargesia mairei</i>         | <i>Fargesia</i> | Sympodial       | endemic         | 3        | 7     |
| <i>Fargesia tenuilignea</i>    | <i>Fargesia</i> | Sympodial       | endemic         | 6        | 12    |
| <i>Fargesia spathacea</i>      | <i>Fargesia</i> | Amphipodi<br>al | endemic         | 3.75     | 8.25  |
| <i>Fargesia qinlingensis</i>   | <i>Fargesia</i> | Sympodial       | endemic         | 2.15     | 5.5   |
| <i>Fargesia nitida</i>         | <i>Fargesia</i> | Amphipodi<br>al | endemic         | 3.5      | 6.65  |
| <i>Fargesia papyrifera</i>     | <i>Fargesia</i> | Sympodial       | endemic         | 7        | 14    |
| <i>Fargesia albocerea</i>      | <i>Fargesia</i> | Sympodial       | non-<br>endemic | 3.5      | 5.75  |
| <i>Fargesia solida</i>         | <i>Fargesia</i> | Sympodial       | endemic         | 4        | 6.75  |
| <i>Fargesia elegans</i>        | <i>Fargesia</i> | Sympodial       | endemic         | 2.75     | 4.6   |
| <i>Fargesia ferax</i>          | <i>Fargesia</i> | Sympodial       | endemic         | 5        | 6.8   |
| <i>Fargesia fungosa</i>        | <i>Fargesia</i> | Sympodial       | endemic         | 5        | 11.5  |
| <i>Fargesia communis</i>       | <i>Fargesia</i> | Sympodial       | endemic         | 6        | 12.25 |
| <i>Fargesia angustissima</i>   | <i>Fargesia</i> | Sympodial       | endemic         | 5.5      | 5.6   |
| <i>Fargesia edulis</i>         | <i>Fargesia</i> | Sympodial       | endemic         | 6.5      | 15    |
| <i>Fargesia jiulongensis</i>   | <i>Fargesia</i> | Sympodial       | endemic         | 4        | 9.25  |
| <i>Fargesia gongshanensis</i>  | <i>Fargesia</i> | Sympodial       | endemic         | 3.5      | 11.25 |
| <i>Fargesia contracta</i>      | <i>Fargesia</i> | Sympodial       | endemic         | 4        | 9     |
| <i>Fargesia semicoriacea</i>   | <i>Fargesia</i> | Sympodial       | endemic         | 2.25     | 8.25  |
| <i>Fargesia hygrophila</i>     | <i>Fargesia</i> | Sympodial       | endemic         | 4        | 10    |
| <i>Fargesia sagittatinea</i>   | <i>Fargesia</i> | Sympodial       | endemic         | 8        | 7.75  |
| <i>Fargesia altior</i>         | <i>Fargesia</i> | Sympodial       | endemic         | 9.5      | 10    |
| <i>Fargesia concinna</i>       | <i>Fargesia</i> | Sympodial       | endemic         | 8        | 9     |
| <i>Fargesia praecipua</i>      | <i>Fargesia</i> | Sympodial       | endemic         | 6        | 12.5  |
| <i>Fargesia yuanjiangensis</i> | <i>Fargesia</i> | Sympodial       | endemic         | 0.14     | 8.05  |
| <i>Fargesia perlonga</i>       | <i>Fargesia</i> | Sympodial       | endemic         | 5        | 14.75 |
| <i>Fargesia circinata</i>      | <i>Fargesia</i> | Sympodial       | endemic         | 4.510904 | 9.75  |
| <i>Fargesia hsuehiana</i>      | <i>Fargesia</i> | Sympodial       | non-<br>endemic | 5        | 10    |
| <i>Fargesia pleniculmis</i>    | <i>Fargesia</i> | Sympodial       | endemic         | 6        | 6     |

|                                        |                        |           |             |          |       |
|----------------------------------------|------------------------|-----------|-------------|----------|-------|
| <i>Fargesia yunnanensis</i>            | <i>Fargesia</i>        | Sympodial | endemic     | 5.5      | 16    |
| <i>Fargesia acuticontracta</i>         | <i>Fargesia</i>        | Sympodial | endemic     | 5        | 16.5  |
| <i>Fargesia longiuscula</i>            | <i>Fargesia</i>        | Sympodial | endemic     | 5.25     | 18.5  |
| <i>Fargesia declivis</i>               | <i>Fargesia</i>        | Sympodial | endemic     | 3.5      | 8     |
| <i>Fargesia farcta</i>                 | <i>Fargesia</i>        | Sympodial | endemic     | 2.75     | 5.75  |
| <i>Fargesia adpressa</i>               | <i>Fargesia</i>        | Sympodial | endemic     | 5        | 9.5   |
| <i>Fargesia pauciflora</i>             | <i>Fargesia</i>        | Sympodial | endemic     | 4        | 10.25 |
| <i>Fargesia grossa</i>                 | <i>Fargesia</i>        | Sympodial | non-endemic | 10       | 6.5   |
| <i>Fargesia hainanensis</i>            | <i>Fargesia</i>        | Sympodial | endemic     | 5        | 8     |
| <i>Fargesia porphyrea</i>              | <i>Fargesia</i>        | Sympodial | endemic     | 4        | 12.5  |
| <i>Fargesia lincangensis</i>           | <i>Fargesia</i>        | Sympodial | endemic     | 6        | 7     |
| <i>Fargesia yulongshanensis</i>        | <i>Fargesia</i>        | Sympodial | endemic     | 6        | 6.5   |
| <i>Fargesia strigosa</i>               | <i>Fargesia</i>        | Sympodial | endemic     | 4.25     | 6.25  |
| <i>Fargesia funiushanensis</i>         | <i>Fargesia</i>        | Sympodial | endemic     | 1.85     | 6     |
| <i>Fargesia dulcicula</i>              | <i>Fargesia</i>        | Sympodial | endemic     | 3.5      | 7.5   |
| <i>Fargesia wuliangshanensis</i>       | <i>Fargesia</i>        | Sympodial | endemic     | 5        | 6.75  |
| <i>Fargesia glabrifolia</i>            | <i>Fargesia</i>        | Sympodial | endemic     | 5        | 6.25  |
| <i>Fargesia plurisetosa</i>            | <i>Fargesia</i>        | Sympodial | non-endemic | 2        | 7.5   |
| <i>Fargesia dracocephala</i>           | <i>Fargesia</i>        | Sympodial | endemic     | 4        | 8.5   |
| <i>Fargesia decurvata</i>              | <i>Fargesia</i>        | Sympodial | endemic     | 2.5      | 10.75 |
| <i>Fargesia conferta</i>               | <i>Fargesia</i>        | Sympodial | endemic     | 4        | 8.5   |
| <i>Fargesia robusta</i>                | <i>Fargesia</i>        | Sympodial | endemic     | 4.5      | 14    |
| <i>Fargesia caduca</i>                 | <i>Fargesia</i>        | Sympodial | endemic     | 4        | 9     |
| <i>Fargesia emaculata</i>              | <i>Fargesia</i>        | Sympodial | endemic     | 3        | 4.25  |
| <i>Fargesia lushuiensis</i>            | <i>Fargesia</i>        | Sympodial | endemic     | 4        | 9.4   |
| <i>Fargesia mali</i>                   | <i>Fargesia</i>        | Sympodial | endemic     | 4.5      | 7     |
| <i>Fargesia exposita</i>               | <i>Fargesia</i>        | Sympodial | endemic     | 4        | 6.75  |
| <i>Fargesia brevipes</i>               | <i>Fargesia</i>        | Sympodial | endemic     | 4.510904 | 4.25  |
| <i>Fargesia cuspidata</i>              | <i>Fargesia</i>        | Sympodial | endemic     | 5        | 7.75  |
| <i>Fargesia ungulata</i>               | <i>Fargesia</i>        | Sympodial | non-endemic | 1.5      | 5.5   |
| <i>Fargesia vicina</i>                 | <i>Fargesia</i>        | Sympodial | endemic     | 4.510904 | 5.25  |
| <i>Drepanostachyum membranaceum</i>    | <i>Drepanostachyum</i> | Sympodial | endemic     | 1.75     | 6.5   |
| <i>Drepanostachyum fractiflexum</i>    | <i>Drepanostachyum</i> | Sympodial | endemic     | 3.25     | 9     |
| <i>Drepanostachyum semiorbiculatum</i> | <i>Drepanostachyum</i> | Sympodial | endemic     | 4.2      | 6     |
| <i>Drepanostachyum ampullare</i>       | <i>Drepanostachyum</i> | Sympodial | endemic     | 3.7      | 9     |
| <i>Himalayacalamus falconeri</i>       | <i>Himalayacalamus</i> | Sympodial | non-endemic | 3.25     | 9     |

|                               |                 |            |             |      |       |
|-------------------------------|-----------------|------------|-------------|------|-------|
| Himalayacalamus collaris      | Himalayacalamus | Sympodial  | non-endemic | 4    | 7.25  |
| Ampelocalamus mianningensis   | Ampelocalamus   | Sympodial  | endemic     | 6    | 18    |
| Ampelocalamus patellaris      | Ampelocalamus   | Sympodial  | non-endemic | 8    | 29.5  |
| Ampelocalamus scandens        | Ampelocalamus   | Sympodial  | non-endemic | 10   | 16.5  |
| Ampelocalamus luodianensis    | Ampelocalamus   | Sympodial  | non-endemic | 10   | 8.5   |
| Ampelocalamus yongshanensis   | Ampelocalamus   | Sympodial  | endemic     | 3    | 18    |
| Ampelocalamus microphyllus    | Ampelocalamus   | Sympodial  | endemic     | 4    | 6     |
| Ampelocalamus actinotrichus   | Ampelocalamus   | Sympodial  | endemic     | 8.5  | 18    |
| Ampelocalamus calcareus       | Ampelocalamus   | Sympodial  | endemic     | 1.5  | 13.5  |
| Ampelocalamus saxatilis       | Ampelocalamus   | Sympodial  | non-endemic | 4.5  | 13    |
| Ampelocalamus melicoideus     | Ampelocalamus   | Sympodial  | non-endemic | 2.5  | 10.25 |
| Ampelocalamus naibunensis     | Ampelocalamus   | Sympodial  | endemic     | 4.5  | 8.5   |
| Ampelocalamus hirsutissimus   | Ampelocalamus   | Sympodial  | endemic     | 4    | 10.75 |
| Ampelocalamus breviligulatus  | Ampelocalamus   | Sympodial  | non-endemic | 4    | 4.7   |
| Chimonocalamus griffithianus  | Chimonocalamus  | Sympodial  | non-endemic | 8    | 16    |
| Chimonocalamus delicatus      | Chimonocalamus  | Sympodial  | endemic     | 9    | 13    |
| Chimonocalamus pallens        | Chimonocalamus  | Sympodial  | endemic     | 6.5  | 13    |
| Chimonocalamus longiligulatus | Chimonocalamus  | Sympodial  | endemic     | 3    | 9.25  |
| Chimonocalamus fimbriatus     | Chimonocalamus  | Sympodial  | endemic     | 6.5  | 10    |
| Chimonocalamus montanus       | Chimonocalamus  | Sympodial  | endemic     | 5    | 8.5   |
| Chimonocalamus makuanensis    | Chimonocalamus  | Sympodial  | endemic     | 5.5  | 11    |
| Chimonocalamus longiusculus   | Chimonocalamus  | Sympodial  | endemic     | 5    | 9.5   |
| Chimonocalamus dumosus        | Chimonocalamus  | Sympodial  | endemic     | 2.25 | 9.5   |
| Gaoligongshania megalothyrsa  | Gaoligongshania | Sympodial  | endemic     | 4.5  | 42.5  |
| Acidosasa breviclavata        | Acidosasa       | Monopodial | endemic     | 1.25 | 15    |
| Acidosasa purpurea            | Acidosasa       | Monopodial | endemic     | 6.5  | 16.5  |

|                                |             |           |         |      |          |
|--------------------------------|-------------|-----------|---------|------|----------|
|                                |             | 1         |         |      |          |
| Acidosasa nanunica             | Acidosasa   | Monopodia | endemic | 4    | 20       |
|                                |             | 1         |         |      |          |
| Acidosasa chinensis            | Acidosasa   | Monopodia | endemic | 8    | 20.5     |
|                                |             | 1         |         |      |          |
| Acidosasa venusta              | Acidosasa   | Monopodia | non-    | 1.4  | 14.5     |
|                                |             | 1         | endemic |      |          |
| Acidosasa lingchuanensis       | Acidosasa   | Monopodia | endemic | 4    | 10.25    |
|                                |             | 1         |         |      |          |
| Acidosasa guangxiensis         | Acidosasa   | Monopodia | endemic | 2.5  | 13       |
|                                |             | 1         |         |      |          |
| Acidosasa notata               | Acidosasa   | Monopodia | endemic | 3.5  | 15       |
|                                |             | 1         |         |      |          |
| Acidosasa chienouensis         | Acidosasa   | Monopodia | endemic | 10   | 12.5     |
|                                |             | 1         |         |      |          |
| Acidosasa edulis               | Acidosasa   | Monopodia | endemic | 12   | 14.5     |
|                                |             | 1         |         |      |          |
| Sasa longiligulata             | Sasa        | Amphipodi | non-    | 1.5  | 15.5     |
|                                |             | al        | endemic |      |          |
| Sasa guangxiensis              | Sasa        | Amphipodi | endemic | 1    | 19.5     |
|                                |             | al        |         |      |          |
| Sasa rubrovaginata             | Sasa        | Amphipodi | endemic | 1.5  | 21.5     |
|                                |             | al        |         |      |          |
| Sasa tomentosa                 | Sasa        | Amphipodi | endemic | 2    | 19       |
|                                |             | al        |         |      |          |
| Sasa oblongula                 | Sasa        | Amphipodi | endemic | 1.25 | 8        |
|                                |             | al        |         |      |          |
| Sasa sinica                    | Sasa        | Amphipodi | endemic | 1.5  | 15       |
|                                |             | al        |         |      |          |
| Sasa hubeiensis                | Sasa        | Amphipodi | endemic | 0.75 | 14.37914 |
|                                |             | al        |         |      |          |
| Sasa qingyuanensis             | Sasa        | Amphipodi | endemic | 1.25 | 23       |
|                                |             | al        |         |      |          |
| Arundinaria fargesii           | Arundinaria | Amphipodi | endemic | 7.5  | 25       |
|                                |             | al        |         |      |          |
| Arundinaria qingchengshanensis | Arundinaria | Amphipodi | endemic | 3    | 27       |
|                                |             | al        |         |      |          |
| Arundinaria racemosa           | Arundinaria | Amphipodi | non-    | 2    | 10       |
|                                |             | al        | endemic |      |          |
| Arundinaria faberi             | Arundinaria | Amphipodi | endemic | 1.75 | 6        |
|                                |             | al        |         |      |          |
| Arundinaria spanostachya       | Arundinaria | Amphipodi | endemic | 2    | 4.45     |
|                                |             | al        |         |      |          |
| Pseudosasa japonica            | Pseudosasa  | Amphipodi | non-    | 3.5  | 17       |

|                                  |                     |           |         |          |          |
|----------------------------------|---------------------|-----------|---------|----------|----------|
|                                  |                     | al        | endemic |          |          |
| <i>Pseudosasa amabilis</i>       | <i>Pseudosasa</i>   | Amphipodi | non-    | 9        | 25.5     |
|                                  |                     | al        | endemic |          |          |
| <i>Pseudosasa yuelushanensis</i> | <i>Pseudosasa</i>   | Amphipodi | endemic | 2.5      | 22.5     |
|                                  |                     | al        |         |          |          |
| <i>Pseudosasa aeria</i>          | <i>Pseudosasa</i>   | Amphipodi | endemic | 6        | 15.5     |
|                                  |                     | al        |         |          |          |
| <i>Pseudosasa jiangleensis</i>   | <i>Pseudosasa</i>   | Amphipodi | endemic | 9.5      | 14.5     |
|                                  |                     | al        |         |          |          |
| <i>Pseudosasa acutivagina</i>    | <i>Pseudosasa</i>   | Amphipodi | endemic | 4        | 27       |
|                                  |                     | al        |         |          |          |
| <i>Pseudosasa pubiflora</i>      | <i>Pseudosasa</i>   | Amphipodi | endemic | 1        | 19       |
|                                  |                     | al        |         |          |          |
| <i>Pseudosasa subsolida</i>      | <i>Pseudosasa</i>   | Amphipodi | endemic | 2.5      | 19       |
|                                  |                     | al        |         |          |          |
| <i>Pseudosasa maculifera</i>     | <i>Pseudosasa</i>   | Amphipodi | endemic | 3        | 10.5     |
|                                  |                     | al        |         |          |          |
| <i>Pseudosasa brevivaginata</i>  | <i>Pseudosasa</i>   | Amphipodi | endemic | 1.4      | 2.8      |
|                                  |                     | al        |         |          |          |
| <i>Pseudosasa wuyiensis</i>      | <i>Pseudosasa</i>   | Amphipodi | endemic | 3        | 14       |
|                                  |                     | al        |         |          |          |
| <i>Pseudosasa longiligula</i>    | <i>Pseudosasa</i>   | Amphipodi | endemic | 8        | 17.25    |
|                                  |                     | al        |         |          |          |
| <i>Pseudosasa gracilis</i>       | <i>Pseudosasa</i>   | Amphipodi | endemic | 1.6      | 16.5     |
|                                  |                     | al        |         |          |          |
| <i>Pseudosasa hindsii</i>        | <i>Pseudosasa</i>   | Amphipodi | endemic | 8.918707 | 10.55639 |
|                                  |                     | al        |         |          |          |
| <i>Pseudosasa cantorii</i>       | <i>Pseudosasa</i>   | Amphipodi | non-    | 3        | 22       |
|                                  |                     | al        | endemic |          |          |
| <i>Pseudosasa orthotropa</i>     | <i>Pseudosasa</i>   | Amphipodi | non-    | 4        | 21.5     |
|                                  |                     | al        | endemic |          |          |
| <i>Pseudosasa viridula</i>       | <i>Pseudosasa</i>   | Amphipodi | endemic | 4        | 19       |
|                                  |                     | al        |         |          |          |
| <i>Pseudosasa magilaminaris</i>  | <i>Pseudosasa</i>   | Amphipodi | endemic | 3.5      | 15       |
|                                  |                     | al        |         |          |          |
| <i>Pleioblastus maculatus</i>    | <i>Pleioblastus</i> | Monopodia | endemic | 5.5      | 13.65    |
|                                  |                     | l         |         |          |          |
| <i>Pleioblastus oleosus</i>      | <i>Pleioblastus</i> | Monopodia | endemic | 4        | 16       |
|                                  |                     | l         |         |          |          |
| <i>Pleioblastus amarus</i>       | <i>Pleioblastus</i> | Monopodia | non-    | 4        | 12       |
|                                  |                     | l         | endemic |          |          |
| <i>Pleioblastus intermedius</i>  | <i>Pleioblastus</i> | Monopodia | endemic | 3.5      | 16.5     |
|                                  |                     | l         |         |          |          |
| <i>Pleioblastus truncatus</i>    | <i>Pleioblastus</i> | Monopodia | endemic | 2        | 16       |

|                             |               |           |                 |      |       |
|-----------------------------|---------------|-----------|-----------------|------|-------|
|                             |               | 1         |                 |      |       |
| Pleioblastus altiligulatus  | Pleioblastus  | Monopodia | endemic         | 3.5  | 14.5  |
|                             |               | 1         |                 |      |       |
| Pleioblastus incarnatus     | Pleioblastus  | Monopodia | endemic         | 3.5  | 13.25 |
|                             |               | 1         |                 |      |       |
| Pleioblastus maculosoides   | Pleioblastus  | Monopodia | endemic         | 6.5  | 15.5  |
|                             |               | 1         |                 |      |       |
| Pleioblastus juxianensis    | Pleioblastus  | Monopodia | endemic         | 2.35 | 15    |
|                             |               | 1         |                 |      |       |
| Pleioblastus solidus        | Pleioblastus  | Monopodia | endemic         | 4.5  | 14.5  |
|                             |               | 1         |                 |      |       |
| Pleioblastus hsienchuensis  | Pleioblastus  | Monopodia | endemic         | 5    | 11.5  |
|                             |               | 1         |                 |      |       |
| Pleioblastus rugatus        | Pleioblastus  | Monopodia | endemic         | 5    | 14.5  |
|                             |               | 1         |                 |      |       |
| Pleioblastus yixingensis    | Pleioblastus  | Monopodia | endemic         | 4    | 18.75 |
|                             |               | 1         |                 |      |       |
| Pleioblastus wuyishanensis  | Pleioblastus  | Monopodia | endemic         | 3    | 11    |
|                             |               | 1         |                 |      |       |
| Pleioblastus sanmingensis   | Pleioblastus  | Monopodia | endemic         | 5    | 17    |
|                             |               | 1         |                 |      |       |
| Pleioblastus fortunei       | Pleioblastus  | Amphipodi | non-<br>endemic | 0.45 | 10.5  |
|                             |               | al        |                 |      |       |
| Pleioblastus distichus      | Pleioblastus  | Amphipodi | non-<br>endemic | 0.6  | 5     |
|                             |               | al        |                 |      |       |
| Oligostachyum oedogonatum   | Oligostachyum | Monopodia | endemic         | 4.5  | 19    |
|                             |               | 1         |                 |      |       |
| Oligostachyum lanceolatum   | Oligostachyum | Monopodia | non-<br>endemic | 4.5  | 16    |
|                             |               | 1         |                 |      |       |
| Oligostachyum hupehense     | Oligostachyum | Monopodia | endemic         | 5.5  | 10.5  |
|                             |               | 1         |                 |      |       |
| Oligostachyum spongiosum    | Oligostachyum | Monopodia | non-<br>endemic | 10   | 13    |
|                             |               | 1         |                 |      |       |
| Oligostachyum scabriflorum  | Oligostachyum | Monopodia | endemic         | 7    | 15    |
|                             |               | 1         |                 |      |       |
| Oligostachyum glabrescens   | Oligostachyum | Monopodia | endemic         | 2    | 10    |
|                             |               | 1         |                 |      |       |
| Oligostachyum scopulum      | Oligostachyum | Monopodia | endemic         | 5    | 11.25 |
|                             |               | 1         |                 |      |       |
| Oligostachyum sulcatum      | Oligostachyum | Monopodia | endemic         | 12   | 12.5  |
|                             |               | 1         |                 |      |       |
| Oligostachyum shiuyingianum | Oligostachyum | Monopodia | endemic         | 5    | 16    |
|                             |               | 1         |                 |      |       |
| Oligostachyum lubricum      | Oligostachyum | Monopodia | non-            | 5    | 12.5  |

|                               |               |           |                 |          |          |
|-------------------------------|---------------|-----------|-----------------|----------|----------|
|                               |               | 1         | endemic         |          |          |
| Oligostachyum gracilipes      | Oligostachyum | Monopodia | endemic         | 2        | 20       |
|                               |               | 1         |                 |          |          |
| Oligostachyum bilobum         | Oligostachyum | Monopodia | endemic         | 1.25     | 18       |
|                               |               | 1         |                 |          |          |
| Oligostachyum nuspiculum      | Oligostachyum | Monopodia | endemic         | 4        | 18       |
|                               |               | 1         |                 |          |          |
| Oligostachyum paniculatum     | Oligostachyum | Monopodia | endemic         | 2.5      | 1.5      |
|                               |               | 1         |                 |          |          |
| Oligostachyum puberulum       | Oligostachyum | Monopodia | endemic         | 4.510904 | 14       |
|                               |               | 1         |                 |          |          |
| Gelidocalamus stellatus       | Gelidocalamus | Amphipodi | endemic         | 2        | 14.5     |
|                               |               | al        |                 |          |          |
| Gelidocalamus kunishii        | Gelidocalamus | Amphipodi | endemic         | 4        | 17.5     |
|                               |               | al        |                 |          |          |
| Gelidocalamus longiinternodus | Gelidocalamus | Amphipodi | endemic         | 5        | 34       |
|                               |               | al        |                 |          |          |
| Gelidocalamus latifolius      | Gelidocalamus | Amphipodi | endemic         | 2        | 18       |
|                               |               | al        |                 |          |          |
| Gelidocalamus tessellatus     | Gelidocalamus | Amphipodi | endemic         | 2.5      | 21       |
|                               |               | al        |                 |          |          |
| Gelidocalamus annulatus       | Gelidocalamus | Amphipodi | endemic         | 1.75     | 21.5     |
|                               |               | al        |                 |          |          |
| Gelidocalamus multifolius     | Gelidocalamus | Amphipodi | endemic         | 1.5      | 11       |
|                               |               | al        |                 |          |          |
| Gelidocalamus solidus         | Gelidocalamus | Amphipodi | endemic         | 2        | 21.5     |
|                               |               | al        |                 |          |          |
| Gelidocalamus rutilans        | Gelidocalamus | Amphipodi | endemic         | 1        | 29       |
|                               |               | al        |                 |          |          |
| Ferrocalamus strictus         | Ferrocalamus  | Monopodia | endemic         | 7        | 32.5     |
|                               |               | 1         |                 |          |          |
| Ferrocalamus rimosivaginus    | Ferrocalamus  | Monopodia | endemic         | 6        | 27.5     |
|                               |               | 1         |                 |          |          |
| Indocalamus sinicus           | Indocalamus   | Amphipodi | non-<br>endemic | 2.4      | 37       |
|                               |               | al        |                 |          |          |
| Indocalamus herklotsii        | Indocalamus   | Amphipodi | endemic         | 2        | 21.5     |
|                               |               | al        |                 |          |          |
| Indocalamus tongchunensis     | Indocalamus   | Amphipodi | endemic         | 1.5      | 24.68478 |
|                               |               | al        |                 |          |          |
| Indocalamus pseudosinicus     | Indocalamus   | Amphipodi | endemic         | 1.75     | 28.75    |
|                               |               | al        |                 |          |          |
| Indocalamus guangdongensis    | Indocalamus   | Amphipodi | endemic         | 2.5      | 29.75    |
|                               |               | al        |                 |          |          |
| Indocalamus longiauritus      | Indocalamus   | Amphipodi | non-            | 0.92     | 22.75    |

|                            |             |           |         |       |       |
|----------------------------|-------------|-----------|---------|-------|-------|
|                            |             | al        | endemic |       |       |
| Indocalamus decorus        | Indocalamus | Amphipodi | endemic | 0.575 | 25    |
|                            |             | al        |         |       |       |
| Indocalamus barbatus       | Indocalamus | Amphipodi | endemic | 1.5   | 37.5  |
|                            |             | al        |         |       |       |
| Indocalamus hirsutissimus  | Indocalamus | Amphipodi | endemic | 3     | 21.5  |
|                            |             | al        |         |       |       |
| Indocalamus emeiensis      | Indocalamus | Amphipodi | endemic | 1.5   | 28    |
|                            |             | al        |         |       |       |
| Indocalamus quadratus      | Indocalamus | Amphipodi | endemic | 3     | 16.5  |
|                            |             | al        |         |       |       |
| Indocalamus hunanensis     | Indocalamus | Amphipodi | endemic | 1.8   | 19    |
|                            |             | al        |         |       |       |
| Indocalamus chishuiensis   | Indocalamus | Amphipodi | endemic | 1     | 2.5   |
|                            |             | al        |         |       |       |
| Indocalamus hispidus       | Indocalamus | Amphipodi | endemic | 2.25  | 19.5  |
|                            |             | al        |         |       |       |
| Indocalamus bashanensis    | Indocalamus | Amphipodi | endemic | 2.5   | 30    |
|                            |             | al        |         |       |       |
| Indocalamus tessellatus    | Indocalamus | Amphipodi | non-    | 1.375 | 33    |
|                            |             | al        | endemic |       |       |
| Indocalamus latifolius     | Indocalamus | Amphipodi | endemic | 2     | 27.5  |
|                            |             | al        |         |       |       |
| Indocalamus hirtivaginus   | Indocalamus | Amphipodi | non-    | 2     | 26.5  |
|                            |             | al        | endemic |       |       |
| Indocalamus inaequilaterus | Indocalamus | Amphipodi | endemic | 1.1   | 2.4   |
|                            |             | al        |         |       |       |
| Indocalamus victorialis    | Indocalamus | Amphipodi | endemic | 2     | 19.5  |
|                            |             | al        |         |       |       |
| Indocalamus pedalis        | Indocalamus | Amphipodi | endemic | 0.3   | 10.75 |
|                            |             | al        |         |       |       |
| Indocalamus wilsonii       | Indocalamus | Amphipodi | endemic | 0.6   | 11.5  |
|                            |             | al        |         |       |       |
| Indosasa crassiflora       | Indosasa    | Monopodia | non-    | 5     | 17    |
|                            |             | l         | endemic |       |       |
| Indosasa shibataeoides     | Indosasa    | Monopodia | non-    | 15    | 15    |
|                            |             | l         | endemic |       |       |
| Indosasa glabrata          | Indosasa    | Monopodia | endemic | 3     | 12    |
|                            |             | l         |         |       |       |
| Indosasa angustata         | Indosasa    | Monopodia | non-    | 14    | 19.5  |
|                            |             | l         | endemic |       |       |
| Indosasa spongiosa         | Indosasa    | Monopodia | endemic | 6.5   | 13.5  |
|                            |             | l         |         |       |       |
| Indosasa ingens            | Indosasa    | Monopodia | endemic | 6     | 20.5  |



|                            |                 |             |         |          |          |
|----------------------------|-----------------|-------------|---------|----------|----------|
|                            |                 | 1           |         |          |          |
| Indosasa sinica            | Indosasa        | Monopodia   | endemic | 10       | 17       |
|                            |                 | 1           |         |          |          |
| Indosasa parvifolia        | Indosasa        | Monopodia   | endemic | 6        | 10       |
|                            |                 | 1           |         |          |          |
| Indosasa patens            | Indosasa        | Monopodia   | endemic | 12       | 19       |
|                            |                 | 1           |         |          |          |
| Indosasa lipoensis         | Indosasa        | Monopodia   | endemic | 10       | 11.5     |
|                            |                 | 1           |         |          |          |
| Indosasa longispicata      | Indosasa        | Monopodia   | non-    | 12.5     | 10.5     |
|                            |                 | 1           | endemic |          |          |
| Indosasa gigantea          | Indosasa        | Monopodia   | non-    | 13       | 10.5     |
|                            |                 | 1           | endemic |          |          |
| Indosasa hispida           | Indosasa        | Monopodia   | endemic | 2.3      | 16       |
|                            |                 | 1           |         |          |          |
| Indosasa singulispicula    | Indosasa        | Monopodia   | endemic | 6        | 19.5     |
|                            |                 | 1           |         |          |          |
| Indosasa triangulata       | Indosasa        | Monopodia   | endemic | 8.918707 | 14.37914 |
|                            |                 | 1           |         |          |          |
| Sinobambusa tootsik        | Sinobambusa     | Monopodia   | non-    | 8.5      | 14       |
|                            |                 | 1           | endemic |          |          |
| Sinobambusa humilis        | Sinobambusa     | Monopodia   | endemic | 1        | 12.55    |
|                            |                 | 1           |         |          |          |
| Sinobambusa farinosa       | Sinobambusa     | Monopodia   | endemic | 7        | 16       |
|                            |                 | 1           |         |          |          |
| Sinobambusa henryi         | Sinobambusa     | Monopodia   | endemic | 10       | 11.5     |
|                            |                 | 1           |         |          |          |
| Sinobambusa intermedia     | Sinobambusa     | Monopodia   | non-    | 5        | 17       |
|                            |                 | 1           | endemic |          |          |
| Sinobambusa nephroaurita   | Sinobambusa     | Monopodia   | endemic | 7        | 14.5     |
|                            |                 | 1           |         |          |          |
| Sinobambusa rubroligula    | Sinobambusa     | Monopodia   | endemic | 3        | 16       |
|                            |                 | 1           |         |          |          |
| Sinobambusa yixingensis    | Sinobambusa     | Monopodia   | endemic | 3        | 10.5     |
|                            |                 | 1           |         |          |          |
| Sinobambusa incana         | Sinobambusa     | Monopodia   | endemic | 8.918707 | 6.5      |
|                            |                 | 1           |         |          |          |
| Sinobambusa dushanensis    | Sinobambusa     | Monopodia   | endemic | 10       | 15       |
|                            |                 | 1           |         |          |          |
| Semiarundinaria densiflora | Semiarundinaria | Amphipodial | endemic | 2.6      | 12.5     |
|                            | a               |             |         |          |          |
| Semiarundinaria fastuosa   | Semiarundinaria | Amphipodial | non-    | 6        | 14       |
|                            | a               |             | endemic |          |          |
| Semiarundinaria sinica     | Semiarundinaria | Amphipodi   | endemic | 4        | 12.5     |

|                                |                |             |             |      |      |  |
|--------------------------------|----------------|-------------|-------------|------|------|--|
|                                | a              | al          |             |      |      |  |
| Chimonobambusa sichuanensis    | Chimonobambusa | Monopodial  | endemic     | 3.25 | 18   |  |
| Chimonobambusa leishanensis    | Chimonobambusa | Amphipodial | endemic     | 2.25 | 1.7  |  |
| Chimonobambusa pubescens       | Chimonobambusa | Amphipodial | endemic     | 2    | 10.5 |  |
| Chimonobambusa marmorea        | Chimonobambusa | Amphipodial | non-endemic | 2    | 12   |  |
| Chimonobambusa purpurea        | Chimonobambusa | Amphipodial | endemic     | 6    | 12   |  |
| Chimonobambusa damingshanensis | Chimonobambusa | Amphipodial | endemic     | 1.75 | 16.5 |  |
| Chimonobambusa brevinoda       | Chimonobambusa | Amphipodial | endemic     | 2.5  | 14.5 |  |
| Chimonobambusa hsuehiana       | Chimonobambusa | Amphipodial | endemic     | 2.5  | 15   |  |
| Chimonobambusa macrophylla     | Chimonobambusa | Amphipodial | endemic     | 4    | 14.5 |  |
| Chimonobambusa tumidissinoda   | Chimonobambusa | Amphipodial | non-endemic | 4.25 | 9.5  |  |
| Chimonobambusa hirtinoda       | Chimonobambusa | Amphipodial | endemic     | 5    | 12   |  |
| Chimonobambusa lactistriata    | Chimonobambusa | Amphipodial | endemic     | 4.5  | 12.5 |  |
| Chimonobambusa paucispinosa    | Chimonobambusa | Amphipodial | endemic     | 4    | 8.75 |  |
| Chimonobambusa armata          | Chimonobambusa | Amphipodial | non-endemic | 3    | 20   |  |
| Chimonobambusa tuberculata     | Chimonobambusa | Amphipodial | endemic     | 3.5  | 22.5 |  |
| Chimonobambusa hejiangensis    | Chimonobambusa | Amphipodial | endemic     | 6    | 16   |  |
| Chimonobambusa convoluta       | Chimonobambusa | Amphipodial | non-endemic | 2.5  | 19   |  |
| Chimonobambusa szechuanensis   | Chimonobambusa | Amphipodial | endemic     | 4.25 | 19   |  |
| Chimonobambusa angustifolia    | Chimonobambusa | Amphipodial | endemic     | 3.5  | 10.5 |  |
| Chimonobambusa utilis          | Chimonobambusa | Amphipodial | endemic     | 7.5  | 10.5 |  |
| Chimonobambusa pachystachys    | Chimonobambusa | Amphipodial | endemic     | 5    | 12   |  |
| Chimonobambusa metuoensis      | Chimonobambusa | Amphipodi   | endemic     | 6    | 22.5 |  |

|                               |                |             |             |       |       |
|-------------------------------|----------------|-------------|-------------|-------|-------|
|                               | sa             | al          |             |       |       |
| Chimonobambusa quadrangularis | Chimonobambusa | Amphipodial | non-endemic | 5.5   | 18.5  |
| Chimonobambusa microfloscula  | Chimonobambusa | Amphipodial | non-endemic | 5     | 14.5  |
| Chimonobambusa ningnanica     | Chimonobambusa | Amphipodial | non-endemic | 10    | 21.5  |
| Chimonobambusa grandifolia    | Chimonobambusa | Amphipodial | endemic     | 4     | 32.5  |
| Chimonobambusa verruculosa    | Chimonobambusa | Amphipodial | endemic     | 2.25  | 11.5  |
| Chimonobambusa unifolia       | Chimonobambusa | Amphipodial | non-endemic | 1.3   | 13.5  |
| Chimonobambusa rigidula       | Chimonobambusa | Amphipodial | non-endemic | 4     | 10    |
| Chimonobambusa opienensis     | Chimonobambusa | Amphipodial | endemic     | 4.5   | 12.25 |
| Chimonobambusa luzhiensis     | Chimonobambusa | Amphipodial | endemic     | 3.75  | 18.5  |
| Chimonobambusa puberula       | Chimonobambusa | Amphipodial | endemic     | 4.5   | 11.75 |
| Chimonobambusa communis       | Chimonobambusa | Amphipodial | endemic     | 5     | 12    |
| Chimonobambusa montigena      | Chimonobambusa | Amphipodial | endemic     | 2.15  | 9.5   |
| Shibataea kumasaca            | Shibataea      | Amphipodial | non-endemic | 1     | 10.25 |
| Shibataea strigosa            | Shibataea      | Amphipodial | endemic     | 0.5   | 6     |
| Shibataea chiangshanensis     | Shibataea      | Amphipodial | endemic     | 0.5   | 7     |
| Shibataea hispida             | Shibataea      | Amphipodial | non-endemic | 1     | 8.5   |
| Shibataea lancifolia          | Shibataea      | Amphipodial | endemic     | 0.725 | 10    |
| Shibataea nanpingensis        | Shibataea      | Amphipodial | endemic     | 1.35  | 20.5  |
| Shibataea chinensis           | Shibataea      | Amphipodial | non-endemic | 1     | 8     |
| Phyllostachys sulphurea       | Phyllostachys  | Monopodial  | non-endemic | 10.5  | 9.3   |
| Phyllostachys makinoi         | Phyllostachys  | Monopodial  | non-endemic | 15    | 11    |
| Phyllostachys meyeri          | Phyllostachys  | Monopodial  | non-        | 8     | 10    |

|                             |               |           |         |     |       |
|-----------------------------|---------------|-----------|---------|-----|-------|
|                             |               | 1         | endemic |     |       |
| Phyllostachys aurea         | Phyllostachys | Monopodia | non-    | 8.5 | 9     |
|                             |               | 1         | endemic |     |       |
| Phyllostachys verrucosa     | Phyllostachys | Monopodia | non-    | 3   | 0.95  |
|                             |               | 1         | endemic |     |       |
| Phyllostachys nuda          | Phyllostachys | Monopodia | non-    | 7.5 | 12    |
|                             |               | 1         | endemic |     |       |
| Phyllostachys arcana        | Phyllostachys | Monopodia | non-    | 8   | 9     |
|                             |               | 1         | endemic |     |       |
| Phyllostachys glauca        | Phyllostachys | Monopodia | non-    | 8.5 | 11.5  |
|                             |               | 1         | endemic |     |       |
| Phyllostachys propinqua     | Phyllostachys | Monopodia | non-    | 6   | 11.5  |
|                             |               | 1         | endemic |     |       |
| Phyllostachys virella       | Phyllostachys | Monopodia | endemic | 9   | 13.5  |
|                             |               | 1         |         |     |       |
| Phyllostachys shuchengensis | Phyllostachys | Monopodia | endemic | 10  | 11.5  |
|                             |               | 1         |         |     |       |
| Phyllostachys angusta       | Phyllostachys | Monopodia | non-    | 8   | 11    |
|                             |               | 1         | endemic |     |       |
| Phyllostachys flexuosa      | Phyllostachys | Monopodia | non-    | 8.5 | 10    |
|                             |               | 1         | endemic |     |       |
| Phyllostachys glabrata      | Phyllostachys | Monopodia | non-    | 6.5 | 9.5   |
|                             |               | 1         | endemic |     |       |
| Phyllostachys iridescens    | Phyllostachys | Monopodia | non-    | 9   | 12.5  |
|                             |               | 1         | endemic |     |       |
| Phyllostachys tianmuensis   | Phyllostachys | Monopodia | endemic | 7.5 | 15    |
|                             |               | 1         |         |     |       |
| Phyllostachys fimbriiligula | Phyllostachys | Monopodia | non-    | 9   | 11.5  |
|                             |               | 1         | endemic |     |       |
| Phyllostachys acuta         | Phyllostachys | Monopodia | non-    | 8   | 13    |
|                             |               | 1         | endemic |     |       |
| Phyllostachys vivax         | Phyllostachys | Monopodia | non-    | 10  | 13.5  |
|                             |               | 1         | endemic |     |       |
| Phyllostachys violascens    | Phyllostachys | Monopodia | non-    | 9   | 12    |
|                             |               | 1         | endemic |     |       |
| Phyllostachys edulis        | Phyllostachys | Monopodia | non-    | 20  | 7.5   |
|                             |               | 1         | endemic |     |       |
| Phyllostachys kwangsiensis  | Phyllostachys | Monopodia | endemic | 12  | 12.5  |
|                             |               | 1         |         |     |       |
| Phyllostachys circumpilis   | Phyllostachys | Monopodia | non-    | 6   | 9.9   |
|                             |               | 1         | endemic |     |       |
| Phyllostachys robustiramea  | Phyllostachys | Monopodia | endemic | 10  | 9.25  |
|                             |               | 1         |         |     |       |
| Phyllostachys mannii        | Phyllostachys | Monopodia | non-    | 9   | 11.75 |

|                                 |               |           |         |          |          |
|---------------------------------|---------------|-----------|---------|----------|----------|
|                                 |               | 1         | endemic |          |          |
| Phyllostachys aureosulcata      | Phyllostachys | Monopodia | non-    | 9        | 12       |
|                                 |               | 1         | endemic |          |          |
| Phyllostachys bissetii          | Phyllostachys | Monopodia | non-    | 5.5      | 9        |
|                                 |               | 1         | endemic |          |          |
| Phyllostachys varioauriculata   | Phyllostachys | Monopodia | endemic | 3.5      | 8        |
|                                 |               | 1         |         |          |          |
| Phyllostachys guizhouensis      | Phyllostachys | Monopodia | endemic | 16       | 9.5      |
|                                 |               | 1         |         |          |          |
| Phyllostachys nigra             | Phyllostachys | Monopodia | non-    | 7        | 8.5      |
|                                 |               | 1         | endemic |          |          |
| Phyllostachys incarnata         | Phyllostachys | Monopodia | endemic | 8        | 13       |
|                                 |               | 1         |         |          |          |
| Phyllostachys dulcis            | Phyllostachys | Monopodia | non-    | 8        | 11.5     |
|                                 |               | 1         | endemic |          |          |
| Phyllostachys platyglossa       | Phyllostachys | Monopodia | non-    | 8        | 10.5     |
|                                 |               | 1         | endemic |          |          |
| Phyllostachys rutila            | Phyllostachys | Monopodia | non-    | 11       | 11.5     |
|                                 |               | 1         | endemic |          |          |
| Phyllostachys reticulata        | Phyllostachys | Monopodia | non-    | 20       | 10.25    |
|                                 |               | 1         | endemic |          |          |
| Phyllostachys viridiglaucescens | Phyllostachys | Monopodia | endemic | 8        | 11.5     |
|                                 |               | 1         |         |          |          |
| Phyllostachys elegans           | Phyllostachys | Monopodia | endemic | 6.25     | 8.25     |
|                                 |               | 1         |         |          |          |
| Phyllostachys prominens         | Phyllostachys | Monopodia | non-    | 10       | 13.25    |
|                                 |               | 1         | endemic |          |          |
| Phyllostachys yunhoensis        | Phyllostachys | Monopodia | non-    | 5.5      | 11.75    |
|                                 |               | 1         | endemic |          |          |
| Phyllostachys nigella           | Phyllostachys | Monopodia | non-    | 7        | 12.5     |
|                                 |               | 1         | endemic |          |          |
| Phyllostachys rubromarginata    | Phyllostachys | Monopodia | endemic | 10       | 11.5     |
|                                 |               | 1         |         |          |          |
| Phyllostachys veitchiana        | Phyllostachys | Monopodia | endemic | 4        | 11       |
|                                 |               | 1         |         |          |          |
| Phyllostachys lofushanensis     | Phyllostachys | Monopodia | endemic | 3        | 8.5      |
|                                 |               | 1         |         |          |          |
| Phyllostachys nidularia         | Phyllostachys | Monopodia | non-    | 10       | 8.5      |
|                                 |               | 1         | endemic |          |          |
| Phyllostachys rivalis           | Phyllostachys | Monopodia | endemic | 4        | 6.3      |
|                                 |               | 1         |         |          |          |
| Phyllostachys carnea            | Phyllostachys | Monopodia | endemic | 8.918707 | 10.55639 |
|                                 |               | 1         |         |          |          |
| Phyllostachys heteroclada       | Phyllostachys | Monopodia | endemic | 6        | 9        |

|                            |               |           |         |     |  |      |
|----------------------------|---------------|-----------|---------|-----|--|------|
|                            |               | 1         |         |     |  |      |
| Phyllostachys stimulosa    | Phyllostachys | Monopodia | endemic | 8   |  | 8.75 |
|                            |               | 1         |         |     |  |      |
| Phyllostachys atrovaginata | Phyllostachys | Monopodia | non-    | 7.5 |  | 9.25 |
|                            |               | 1         | endemic |     |  |      |
| Phyllostachys rubicunda    | Phyllostachys | Monopodia | non-    | 6   |  | 9.25 |
|                            |               | 1         | endemic |     |  |      |
| Phyllostachys parvifolia   | Phyllostachys | Monopodia | endemic | 8   |  | 4.85 |
|                            |               | 1         |         |     |  |      |

---

**Table S2.** Correlations among functional traits of bamboos and climatic factors. \* indicates  $P < 0.05$ , \*\* indicates  $P < 0.01$ , \*\*\* indicates  $P < 0.001$ . AMT, Annual average temperature MDR, Mean diurnal range; IS, Isothermality; MTWM, Max temperature of warmest month; TAR, Temperature annual range; MTDQ, Mean temperature of driest quarter; AP, Annual precipitation; PDQ, Precipitation of driest quarter.

| Variables          | Culm height | Leaf length | AMT      | MDR      | IS       | MTWM    | TAR      | MTDQ    | AP      | PDQ    |
|--------------------|-------------|-------------|----------|----------|----------|---------|----------|---------|---------|--------|
| <b>Culm height</b> | 1           |             |          |          |          |         |          |         |         |        |
| <b>Leaf length</b> | 0.25***     | 1           |          |          |          |         |          |         |         |        |
| <b>AMT</b>         | 0.23***     | 0.28***     | 1        |          |          |         |          |         |         |        |
| <b>MDR</b>         | 0.02        | 0.09        | -0.24*** | 1        |          |         |          |         |         |        |
| <b>IS</b>          | 0.16***     | 0.04        | -0.37*** | 0.48***  | 1        |         |          |         |         |        |
| <b>MTWM</b>        | 0.16***     | 0.22***     | 0.83***  | -0.36*** | -0.4***  | 1       |          |         |         |        |
| <b>TAR</b>         | -0.14**     | -0.17***    | -0.58*** | 0.02     | -0.53*** | -0.05   | 1        |         |         |        |
| <b>MTDQ</b>        | 0.28***     | 0.28***     | 0.95***  | -0.13*   | 0.26***  | 0.67*** | -0.69*** | 1       |         |        |
| <b>AP</b>          | 0.15***     | 0.22***     | 0.46***  | -0.27*** | -0.27*** | 0.42*** | -0.22*** | 0.47*** | 1       |        |
| <b>PDQ</b>         | -0.03       | 0.10*       | 0.14***  | -0.36*** | -0.71*** | 0.44*** | 0.33***  | 0.06    | 0.65*** | 1      |
| <b>PWAQ</b>        | 0.17***     | 0.17***     | 0.34***  | -0.05    | 0.12**   | 0.11**  | -0.38*** | 0.38*** | 0.73*** | 0.11** |

**Table S3.** Correlations among functional traits of bamboos and soil factors. \* indicates  $P < 0.05$ , \*\* indicates  $P < 0.01$ , \*\*\* indicates  $P < 0.001$ .

| Variables               | Culm height | Leaf length | Sand fraction | Silt fraction | Clay fraction | Organic<br>matter | Total phosphorus | Total<br>potassium | pH |
|-------------------------|-------------|-------------|---------------|---------------|---------------|-------------------|------------------|--------------------|----|
| <b>Culm height</b>      | 1           |             |               |               |               |                   |                  |                    |    |
| <b>Leaf length</b>      | 0.25***     | 1           |               |               |               |                   |                  |                    |    |
| <b>Sand fraction</b>    | -0.1*       | -0.05       | 1             |               |               |                   |                  |                    |    |
| <b>Silt fraction</b>    | 0.16***     | -0.12**     | -0.53***      | 1             |               |                   |                  |                    |    |
| <b>Clay fraction</b>    | 0.24***     | 0.15***     | -0.76***      | -0.14**       | 1             |                   |                  |                    |    |
| <b>Organic matter</b>   | -0.08*      | -0.11*      | 0.10*         | 0.29***       | -0.34***      | 1                 |                  |                    |    |
| <b>Total phosphorus</b> | -0.09*      | -0.12**     | -0.04         | 0.10*         | -0.03         | 0.12**            | 1                |                    |    |
| <b>Total potassium</b>  | -0.12**     | -0.04       | 0.28***       | 0.22***       | -0.50***      | 0.22***           | -0.06            | 1                  |    |
| <b>pH</b>               | 0.01        | -0.10*      | 0.16***       | -0.24***      | -0.02         | -0.33***          | 0.09*            | 0.14**             | 1  |
